# Supplementary material
Source: PubMed Central journal article supplement (PMC8975998)
Supplement: 41401_2021_735_MOESM1_ESM.pdf [file 41401_2021_735_MOESM1_ESM.pdf]

## **Protein production for Surface Plasmon Resonance**

The codon-optimized genes encoding for S1-RBD of SARS-CoV-2 (residues 319-591) and its subdomain of SARS-CoV-2 (residues 333-530) containing human CD5 signal peptide sequence and mouse Ig Kappa Locus secretion signal sequence respectively, two purification tags (8xHistidine tag and HRV 3C tag) and TEV protease cleavage sites were cloned into the mammalian expression vector pCDNA3.4(Thermo Fisher Scientific). All constructs were confirmed by BioSune sequencing. Proteins were expressed in Expi293F cells using an ExpiFectamine expression system kit in accordance with the recommended protocol of the manufacturer (Thermo Fisher Scientific). Cells were grown in sterile TC flasks and vented in a Climo Shaker ISF4-XC at 110 RPM (orbital diameter of 50 mm) at 37° C and 8% CO<sub>2</sub>. When cells reached a density between 3.5 and 5x10<sup>6</sup> cells/mL, they were counted, and appropriately diluted into a shaker flask for transfections. The culture supernatant was harvested on day 7 post transfection unless otherwise specified, and then adjusted to 1× Ni-NTA buffer (50mM Tris-HCl/500mM NaCl/20mM Imidazole, pH 8) using stock solutions, and centrifuged at 30,000 g for 25 min before purification using Ni-NTA resin (GE Healthcare). Protein purity was estimated as > 95% by SDS-PAGE and protein concentration was measured spectrophotometrically (NanoVue, GE Healthcare).

## **BLI kinetic measurements of ACE2 binding to immobilized Fc-RBD**

All interaction experiments were conducted at 30 °C in PBS, 0.02% Tween 20, 0.1% BSA, pH 7.4, using an Octet Red 96 instrument (Sartorius, Fremont, California, USA). The final volume for all solutions was 200 µl. Assays were performed in black, solid 96-well, flat bottom plates and agitated, which was set to 1000 rpm. Sensors were loaded with 10 µg/ml ligand (Fc-RBD). A 120 s biosensor washing step was utilized before the analysis of the ligand association from the biosensor to the analyte in solution, which was performed for 180 s. The concentration of the analyte (ACE2) were 150nM, 75nM, 37.5nM, 18.75nM, 9.375nM, 4.68nM. Finally, the dissociation was allowed to proceed for 180 s. The dissociation wells were used only once to ensure the potency of the buffer. The correction of any systematic baseline drift was accomplished by subtracting the shift recorded for sensors loaded with ligand but no analyte.

To characterize whether MLN4760 could inhibit ACE2 binding to immobilized Fc-RBD, the proA sensors, which were coated with Fc-RBD, were exposed to 150nM, 75nM, 37.5nM, 18.75nM, 9.375nM, 4.68nM ACE2 with 1.5µM MLN4760. The proA sensors, which were coated with Fc, were exposed to 150nM, 75nM, 37.5nM, 18.75nM, 9.375nM, 4.68nM ACE2 with 1.5µM MLN4760. Sensors coated with Fc were as negative control. The correction of any systematic baseline drift was accomplished by subtracting the shift recorded for sensors loaded with ligand but no analyte.

## **ADMET properties prediction**

To evaluate the ADMET properties of these identified natural products, we used the admetSAR webserver to make the predictions. The ADMET properties include Human Intestinal Absorption (HIA), Blood Brain Barrier, P-glycoprotein inhibition as well as substrate, CYPs substrate as well as inhibition (CYP3A4, CYP2C9, CYP2D6, CYP3A4, CYP2C19 and CYP1A2), ames

mutagenesis, and hepatotoxicity.
